# Supplementary material for: Native extracellular matrix-derived semipermeable, optically transparent, and inexpensive membrane inserts for microfluidic cell culture
Source: Royal Society of Chemistry journal article supplement (doi:10.1039/c7lc00317j), 2017-01-01

**Figure S1.** Measurement of membrane thickness. **A.** Thickness of single layer COL membranes fabricated using 8 mg/ml and 2 mg/ml collagen hydrogel concentrations, as well as COL-MAT membranes at blending ratios of 80:20 and 50:50. **B.** Thickness of 1-layer, 2-layer, 3-layer and 4-layer stacked COL membranes fabricated using 8 mg/ml collagen hydrogels.

**Figure S2.** Measurement of average pore size for COL ( $n = 1099$  pores) and COL-ALG ( $n = 1514$  pores) membranes from scanning electron micrographs. \*\*\* shows  $P < 0.001$  for COL vs. COL-ALG.

**Figure S3.** Analysis of membrane surface adsorption. **A.** Phase contrast micrographs (top row) and corresponding fluorescence micrographs (bottom row) of untreated COL membranes (COL control) and bare COL membranes treated with 1 mg/ml fluorescein-conjugated bovine serum albumin for 2 hours (COL + FITC-BSA). Additionally, pericyte-seeded COL membranes (COL + cells + FITC-BSA) and Transwell polyester membranes (Transwell + FITC-BSA) were treated with FITC-BSA under the same conditions. Magnification = 100x in all images. **B.** Average fluorescence intensity of FITC-BSA-treated COL (with and without cells) membranes and Transwell inserts.  $n =$  at least 13 images per group. \* and \*\* show  $P < 0.05$  and  $P < 0.01$  compared to Transwell, respectively. The fluorescence intensity of untreated COL membranes at the exposure time utilized was negligible.

**Figure S4.** An environmental scanning electron micrograph of a hydrated COL-MAT demonstrates a smooth surface texture, indicating transition from a dry fibrous membrane film to a gel-like state upon rehydration as occurs in microdevices prior to cell culture. The feature at the upper left corner of the image is a cut edge of the membrane which appears slightly frayed when the membranes are dry. Scale bar = 40  $\mu\text{m}$ .

**Figure S5.** Demonstration of membrane stability in extended culture. **A.** A bare COL membrane perfused with cell culture medium for 7 days was stained for type I collagen (green). Scale bar = 200  $\mu\text{m}$ . **B.** A COL membrane was seeded with pericytes and maintained under identical perfusion conditions for 7 days before. Green and blue show type I collagen and cell nuclei, respectively. Scale bar = 200  $\mu\text{m}$ . **C.** The cross-sectional view of the pericyte-seeded COL membrane shows the persistence of structurally stable type I collagen membrane underneath the pericyte cell layer. Similar results were observed when HUVECs were cultured on COL membranes for 14 days (data not shown).

Figure S1.

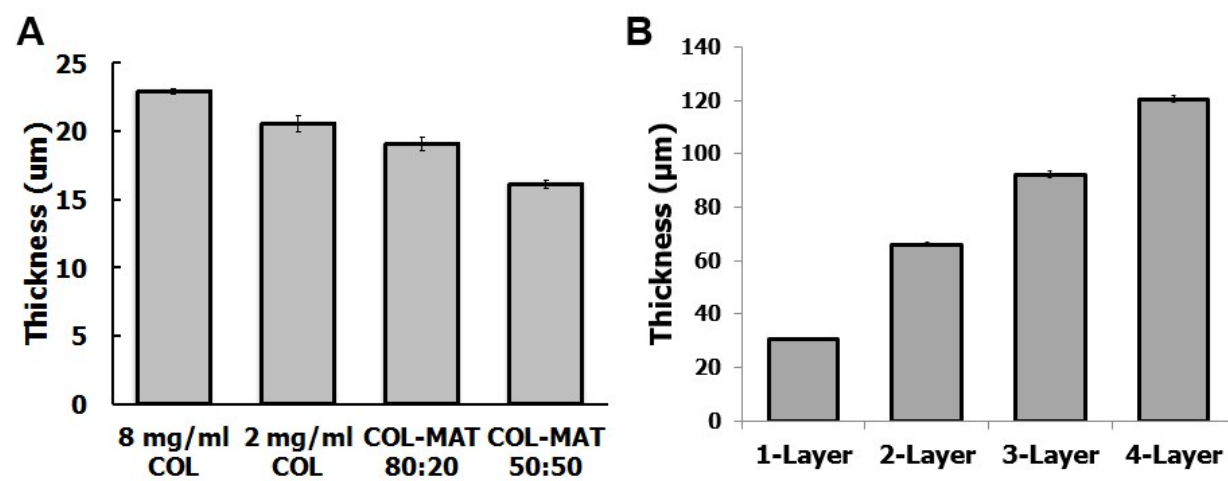

**Figure S2.**

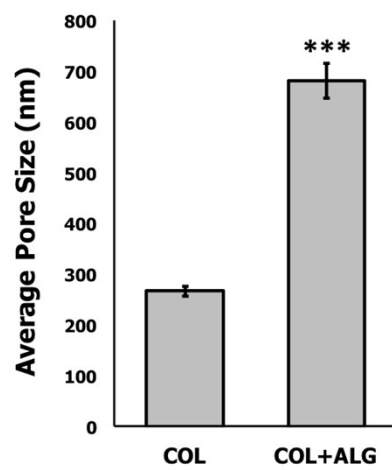

Figure S3.

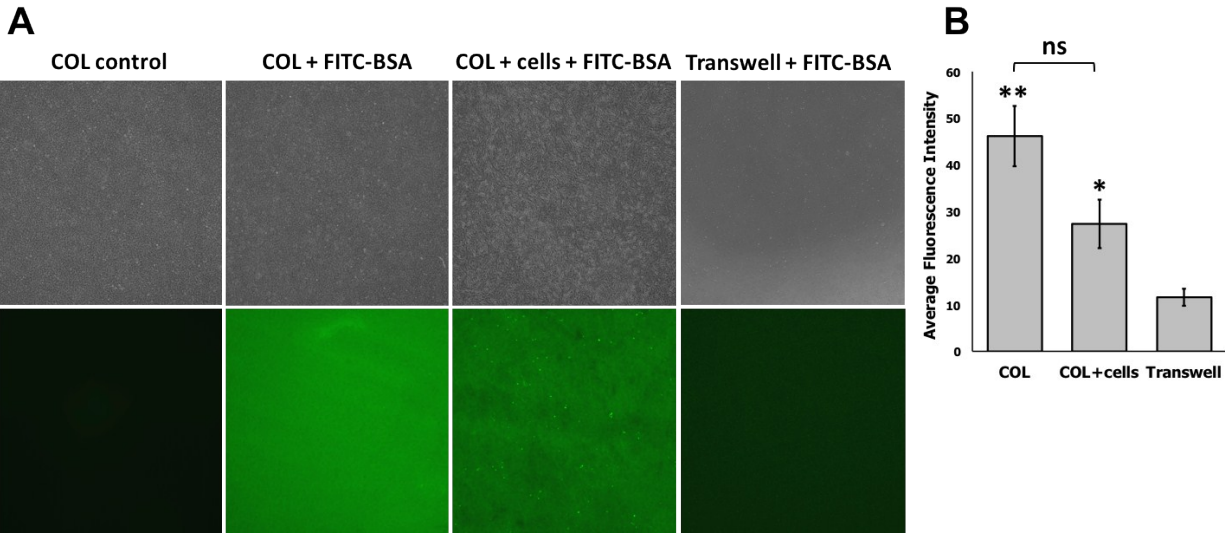

**Figure S4.**

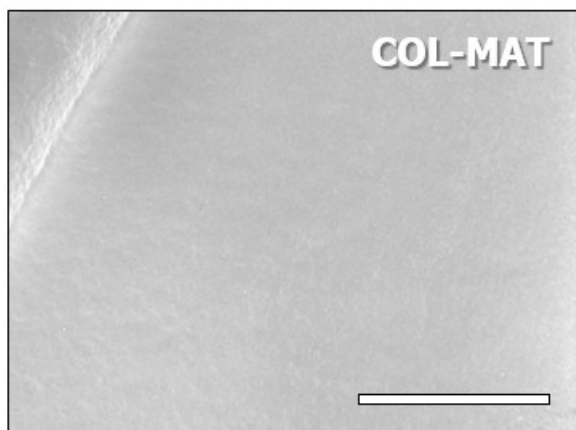

Figure S5.

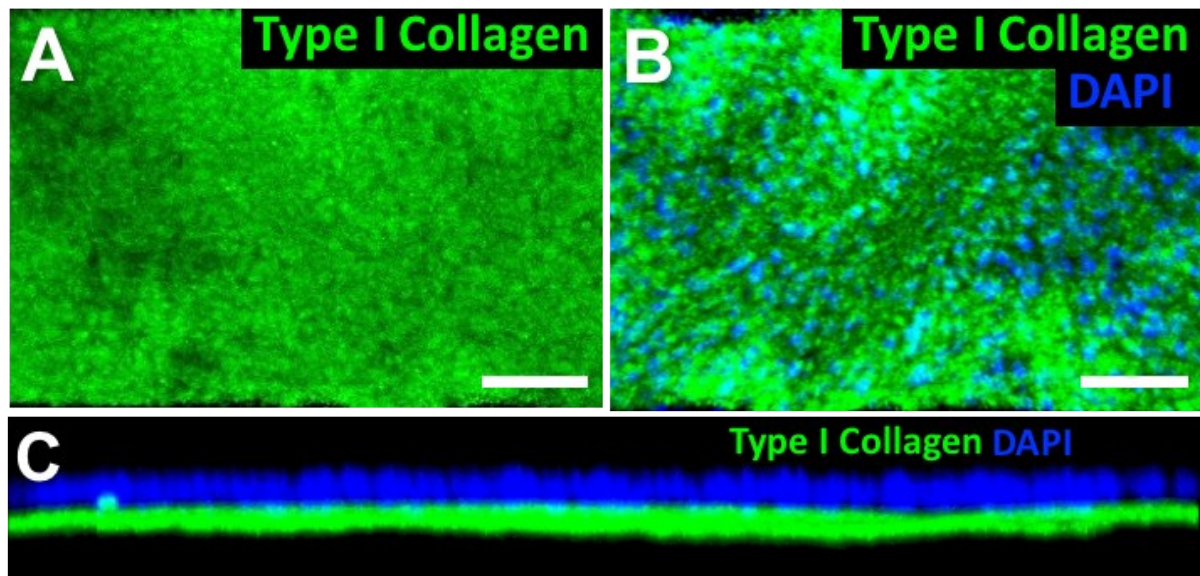

Supplement: c7lc00317j1.pdf [file c7lc00317j1.pdf]
